DECEMBER 2023 | VOLUME 180 | NUMBER 12

# The American Journal of Psychiatry

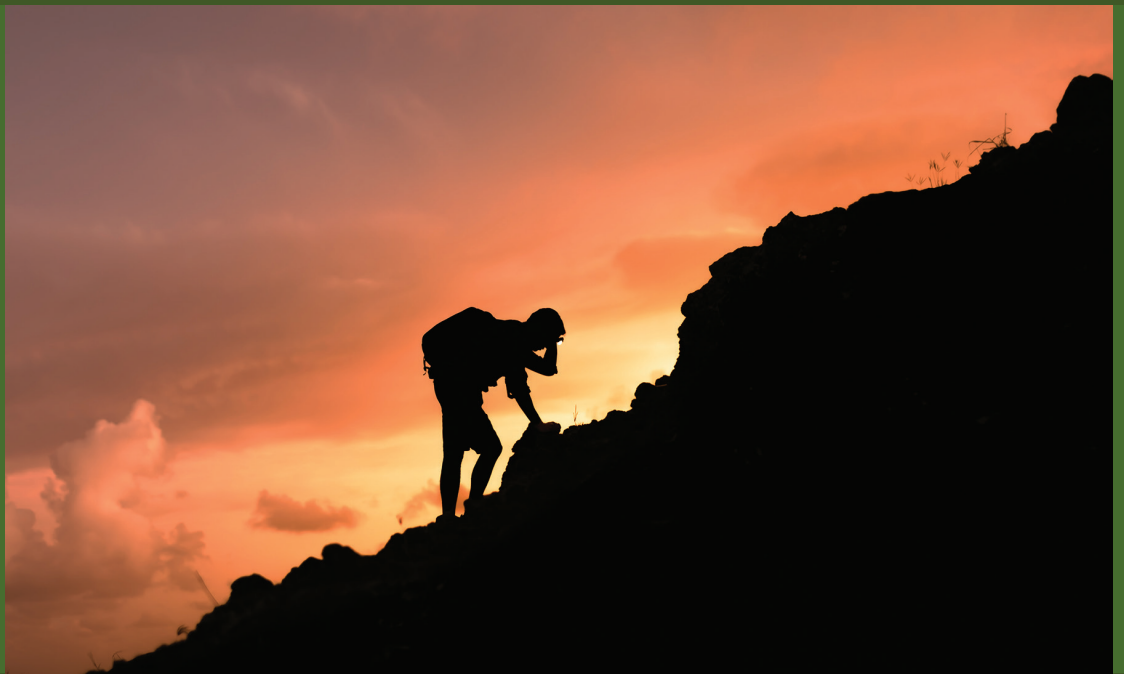

Adversity and Resilience, Postpartum Depression,  
Suicide, and Racial/Ethnic Disparities

Meta-Analyses of Genome-Wide Association Studies  
for Postpartum Depression

Racial and Ethnic Disparities in COVID-19-Related  
Stressor Exposure and Adverse Mental Health  
Outcomes Among Health Care Workers

Adult Mental Health, Substance Use Disorders, and Functional  
Outcomes of Children Resilient to Early Adversity

AMERICAN  
**PSYCHIATRIC**  
ASSOCIATION 

[ajp.psychiatryonline.org](http://ajp.psychiatryonline.org)
