# NEW TITLES from AMERICAN PSYCHIATRIC ASSOCIATION PUBLISHING

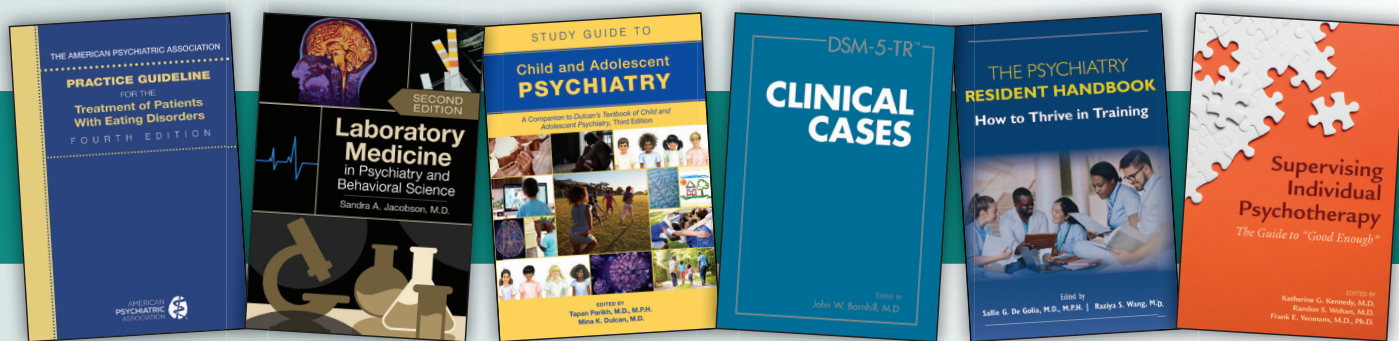

## The American Psychiatric Association Practice Guideline for the Treatment of Patients with Eating Disorders, Fourth Edition

American Psychiatric Association

The guideline focuses on evidence-based pharmacological, psychotherapeutic, and other nonpharmacological treatments for eating disorders, primarily anorexia nervosa, bulimia nervosa, and binge-eating disorder. In addition to statements related to assessment and treatment planning, the guideline provides direction on implementing these recommendations into clinical practice.

2023 • 114 pages • ISBN 978-0-89042-584-8 • Paperback • \$59.00 • Item #2584  
2023 • 114 pages • ISBN 978-0-89042-585-5 • eBook • \$47.00 • Item #2585

## Laboratory Medicine in Psychiatry and Behavioral Science, Second Edition

Sandra A. Jacobson, M.D.

This new volume contains detailed descriptions of more than 150 laboratory tests, 120 diseases and conditions—including, for the first time, COVID-19, 22q11.2 deletion syndrome, and DRESS syndrome—and 70 psychotropic medications. This edition also features appendixes that include algorithms, tables, and figures that aid in understanding and interpreting various laboratory tests and their underlying biology.

2023 • 750 pages • ISBN 978-1-61537-450-2 • Paperback • \$85.00 • Item #37450  
2023 • 750 pages • ISBN 978-1-61537-451-9 • eBook • \$68.00 • Item #37451

## Study Guide to Child and Adolescent Psychiatry A Companion to Dulcan's Textbook of Child and Adolescent Psychiatry, Third Edition, Second Edition

Edited by Tapan Parikh, M.D., M.P.H., and Mina K. Dulcan, M.D.

This is a question-and-answer companion that allows you to evaluate your mastery of the subject matter as you progress through *Dulcan's Textbook of Child and Adolescent Psychiatry*, Third Edition. Questions are followed by an answer guide that references relevant text.

2023 • 360 pages • ISBN 978-1-61537-491-5 • Paperback • \$65.00 • Item #37491  
2023 • 360 pages • ISBN 978-1-61537-492-2 • eBook • \$52.00 • Item #37492

## DSM-5-TR<sup>®</sup> Clinical Cases

Edited by John W. Barnhill, M.D.

*DSM-5-TR Clinical Cases* clarifies and discusses psychiatric diagnosis with a particular focus on how diagnoses have evolved from DSM-5. This book presents a broad range of patient vignettes that cover the diagnostic waterfront. Each of the 104 cases is followed by a discussion by an expert clinician, who describes an approach to diagnosis through an exploration of psychiatric and personal history, symptom clusters, laboratory tests, and clinical ambiguities.

2023 • 416 pages • ISBN 978-1-61537-361-1 • Paperback • \$92.00 • Item #37361  
2023 • 416 pages • ISBN 978-1-61537-362-8 • eBook • \$74.00 • Item #37362

## The Psychiatry Resident Handbook How to Thrive in Training

Edited by Sallie G. De Golia, M.D., M.P.H., and Raziya Wang, M.D.

This guide deftly combines the wisdom of seasoned leaders in psychiatry residency and fellowship with the perspectives of current residents-in-training to deliver a holistic approach for making the most of the training years. Issues of identity, clinical practice, skill-building, career development, and balancing work and a personal life all are addressed in chapters that apply the information to real-life scenarios and encourage self-awareness and professional identity development.

2023 • 582 pages • ISBN 978-1-61537-411-3 • Paperback • \$67.00 • Item #37411  
2023 • 582 pages • ISBN 978-1-61537-412-0 • eBook • \$54.00 • Item #37412

## Supervising Individual Psychotherapy The Guide to "Good Enough"

Edited by Katherine G. Kennedy, M.D., Randon S. Welton, M.D., and Frank E. Yeomans, M.D., Ph.D.

Combining theoretical concepts with practical applications, it covers four key areas: the process of supervisor development; specific techniques used in supervision; common challenges that may arise in supervision; and supervision within various care settings and for specific populations, including a discussion of the possible effects of supervisee and supervisor race, gender identity, and sexual orientation on the supervisory process.

2023 • 392 pages • ISBN 978-1-61537-424-3 • Paperback • \$70.00 • Item #37424  
2023 • 392 pages • ISBN 978-1-61537-425-0 • eBook • \$56.00 • Item #37425

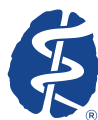

PERMANENTE MEDICINE®

## Psychiatrists

Permanente Medicine is medicine you can believe in.

You'll be empowered to focus on your patients, so you can practice as you always intended: With compassion and respect for your patients' needs and preferences. At every step, you'll have the support of experienced care teams, the best clinical evidence, and trailblazing technologies that help make care delivery efficient, effective, and personalized.

You'll receive excellent compensation, a broad range of benefits, and a generous retirement package.

Explore your opportunities at:  
[bit.ly/PMpsychiatry1223](https://bit.ly/PMpsychiatry1223)

*When required by law, wage ranges are posted on the medical group websites.*

We are an EOE/AA/M/F/D/V employer.

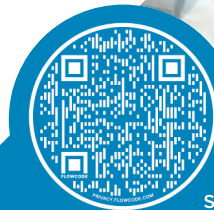

Scan here to take the next step in your Psychiatry career.

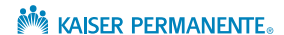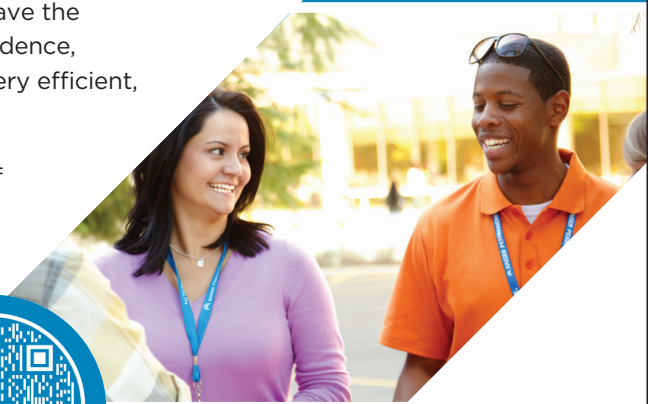

## APA Publishing Audio Books

### Listen anytime, anywhere

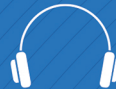

Purchase and listen at [appi.org](https://appi.org)

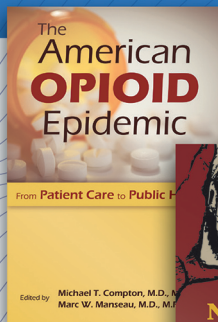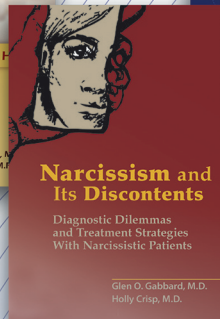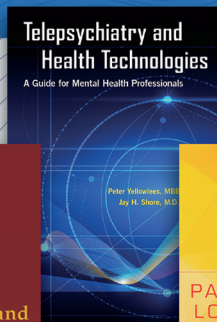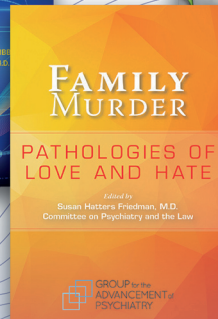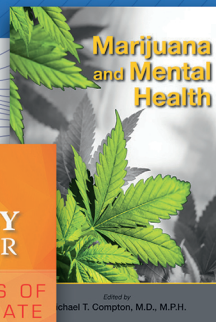

Also available at: Google Podcasts, Apple Podcasts, Spotify, Stitcher, and YouTube

AMERICAN  
PSYCHIATRIC  
ASSOCIATION  
PUBLISHING 

[www.appi.org](https://www.appi.org)  
Email: [appi@psych.org](mailto:appi@psych.org)  
Toll-Free: 1-800-368-5777

# THE AMERICAN PSYCHIATRIC ASSOCIATION

800 Maine Avenue, S.W., Suite 900, Washington, D.C. 20024

(888) 357-7924 (toll-free inside the U.S. and Canada)

web site: [www.psychiatry.org](http://www.psychiatry.org) • e-mail: [apa@psych.org](mailto:apa@psych.org)

## Chairpersons of Committees, Councils, and Task Forces

### STANDING COMMITTEES

#### Bylaws

Edward R. Herman, J.D., M.D.

#### Elections

Josepha A. Cheong, M.D.

#### Ethics

Charles Dike, M.D.

#### Finance and Budget

Steven S. Sharfstein, M.D.

*Audit:* Richard F. Summers, M.D.

*Investment Oversight:* David Fassler, M.D.

#### Joint Reference

Ramaswamy Viswanathan, M.D., Dr.Med.Sc.

#### Membership

Gail Robinson, M.D.

#### Nominating

Rebecca W. Brendel, M.D., J.D.

#### Tellers

Katherine M. Napalinga, M.D.

### NON-STANDING COMMITTEES

#### Conflict of Interest

Gabrielle L. Shapiro, M.D.

#### Structural Racism Accountability

Kamalika Roy, M.D., M.C.R.

### COUNCILS

#### Council on Addiction Psychiatry

Smita Das, M.D., M.P.H., Ph.D.

#### Council on Advocacy and Government Relations

Katherine G. Kennedy, M.D.

*Advocacy and Litigation Funding:* Patrick Aquino, M.D.

#### Council on Children, Adolescents, and Their Families

Anish R. Dube, M.D., M.P.H.

*Women's Mental Health:* Ludmila B. De Faria, M.D.

#### Council on Communications

Howard Liu, M.D., M.B.A.

#### Council on Consultation-Liaison Psychiatry

Maria L. Tiamson-Kassab, M.D.

#### Council on Geriatric Psychiatry

Daniel C. Dahl, M.D.

#### Council on Healthcare Systems and Financing

Robert L. Trestman, M.D., Ph.D.

*Integrated Care:* Shannon M. Kinnan, M.D.

*RRVS, Codes and Reimbursement:* Jeremy S. Musher, M.D.

*Reimbursement for Psychiatric Care:* Sander Koyfman, M.D.

#### Council on International Psychiatry and Global Health

Pamela Collins, M.D., M.P.H.

#### Council on Medical Education and Lifelong Learning

Art Walaszek, M.D.

*Innovation:* Steven Chan, M.D., M.B.A.

*Scientific Program:* Eric Williams, M.D.

*Scientific Program—Mental Health Services Conference (Oct. to Oct. tenure):* Lawrence Malak, M.D.

*Vestermark Award Committee:* Donna M. Sudak, M.D.

*Well-Being and Burnout:* Uchenna Okoye, M.D., M.P.H.

#### Council on Minority Mental Health and Health Disparities

Walter Wilson, Jr., M.D.

#### Council on Psychiatry and Law

Richard Martinez, M.D., M.H.

*Judicial Action:* Reena Kapoor, M.D.

#### Council on Quality Care

Carol L. Alter, M.D.

*Mental Health Information Technology:* Darlene R. King, M.D.

*Quality and Performance Measurement:* David S. Kroll, M.D.

*Practice Guidelines:* Daniel J. Anzia, M.D.

*Telepsychiatry:* Shabana Khan, M.D.

#### Council on Research

Jonathan E. Alpert, M.D., Ph.D.

*Climate Change and Mental Health:* Joshua Wortzel, M.D.

*Psychiatric Dimensions of Disasters:* Joshua C. Morganstein, M.D.

# ▶ PODCASTS from APA Publishing

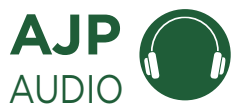

## AJP Audio

Host: Aaron Van Dorn, Online Content Manager

Each episode features an in-depth interview with an author from the most discussed article appearing in the latest issue of *The American Journal of Psychiatry*, along with Editor-in-Chief Ned Kalin highlighting the rest of the issue.

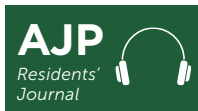

## The American Journal of Psychiatry Residents' Journal

Created by trainees for trainees and featuring interviews covering a wide array of topics including career exploration, personal/professional journeys, clinical practice tips, and more.

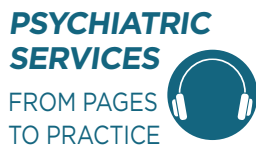

## Psychiatric Services From Pages to Practice

Hosts: Lisa Dixon, M.D., M.P.H., Editor, *Psychiatric Services*, and Josh Berezin, M.D., M.S.

Learn about the latest mental health services research published in *Psychiatric Services* and why it is relevant. Topics include community-based treatment programs, collaborative care, evidence-based treatment and service delivery, criminal and social justice, policy analysis, and more.

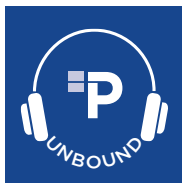

## Psychiatry Unbound

Host: Laura Roberts, M.D., M.A., Editor-in-Chief, APA Publishing Books

APA Publishing's Books podcast offers the opportunity to hear the voices behind the most prominent psychiatric scholarship in the field today. Learn about important topics in the field of psychiatry and see how our authors are making an impact in clinical settings throughout the world.

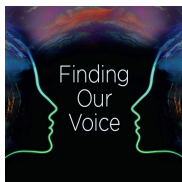

## Finding Our Voice

Host: Sanya Virani, MBBS, MPH

Finding Our Voice brings the viewpoints and opinions of the next generation of psychiatrists—including residents, fellows, and early career psychiatrists—to the forefront. Topics covered include systemic racism and social determinants.

Subscribe Today!

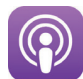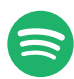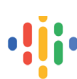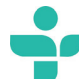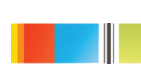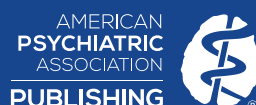



# Go Online

Visit [ajp.psychiatryonline.org](http://ajp.psychiatryonline.org) for these features!

## AJP in Advance

*Discover the latest research advances before they appear in print*

### **Effects of Bundling Medication for Opioid Use Disorder With an mHealth Intervention Targeting Addiction: A Randomized Clinical Trial**

As the opioid epidemic and its devastating consequences continue to worsen, the need for effective interventions grows increasingly urgent. This study tested whether a smartphone app designed to help with addiction recovery could improve rates of abstinence for patients in treatment that includes medications for opioid use disorder. The authors found that the app may help certain patients—in particular, those not experiencing withdrawal symptoms and those taking methadone—and that it may improve treatment utilization.

## AJP Audio and Video

Aaron Breslow, Ph.D., joins AJP Audio to discuss “Racial and Ethnic Disparities in COVID-19-Related Stressor Exposure and Adverse Mental Health Outcomes Among Health Care Workers” (p. 896).

In an issue highlights video, AJP Deputy Editor Danny Pine also discusses the article by Breslow et al. (p. 896) as well as “Adult Mental Health, Substance Use Disorders, and Functional Outcomes of Children Resilient to Early Adversity” (Copeland et al., p. 906).

## AJP CME

You can earn CME credits by reading articles in *The American Journal of Psychiatry*. Three articles in this issue form a short course that consists of reading the article and answering three multiple-choice questions with a single correct answer for up to 1 AMA PRA Category 1 Credit™ each. Credit is issued only to subscribers of the online AJP CME Course Program.

See the list below for articles in this month’s issue that are the subject of a CME quiz.

### **In this issue**

Meta-Analyses of Genome-Wide Association Studies for Postpartum Depression (Guintivano et al., p. 884)

Racial and Ethnic Disparities in COVID-19-Related Stressor Exposure and Adverse Mental Health Outcomes Among Health Care Workers (Breslow et al., p. 896)

Adult Mental Health, Substance Use Disorders, and Functional Outcomes of Children Resilient to Early Adversity (Copeland et al., p. 906)

@APAPubJournals

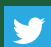

Psychiatry Online

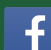

AMERICAN  
PSYCHIATRIC  
ASSOCIATION  
PUBLISHING

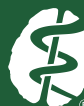

[www.appi.org](http://www.appi.org)  
1-800-368-5777  
[appi@psych.org](mailto:appi@psych.org)



Searching for  
the perfect  
psychiatric  
career?

## Let APA JobCentral help!

### Manage Your Career

- Browse hundreds of active job listings!
- Create an account to save jobs, store multiple resumes and cover letters and communicate with employers through our internal messaging system.
- Set up multiple job alerts specifying your skills, interests and location to receive e-mails when employers post jobs that match your criteria.

### Recruit for Open Positions

- Post your job in front of thousands of highly qualified psychiatrists.
- Cross promote your job listing in Psychiatric News.
- Search the anonymous resume database to find your ideal candidate.

AMERICAN  
PSYCHIATRIC  
ASSOCIATION

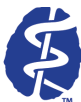

**JOBCENTRAL**  
The Career Hub for Psychiatry

[jobs.psychiatry.org](https://jobs.psychiatry.org)

## Assistant/Associate/Professor of Clinical Pediatrics /Physician Surgeon/Psychiatry

**Hiring Department:** Pediatrics  
**Location:** Peoria, IL USA  
**Requisition ID:** 1020638  
**Posting Close Date:** 11/16/2023

The University of Illinois College of Medicine at Peoria (UICOMP) seeks physicians for positions at the level of Professor, Associate Professor or Assistant Professor to enhance an important clinical program.

Pediatric Psychiatrist positions require candidates who are BC in Psychiatry and have completed 4 years in residency and 2 years in fellowship training in Pediatric Psychiatry. Candidates with scholarly and research interests are highly desirable, along with experience in teaching medical students and residents.

UICOMP is one of the regional campuses that make up the nation's largest public medical school. The Peoria campus is known among students for its small class sizes, rigorous curriculum and hands-on clerkships; to residents and fellows for the strong academic setting, large referral base and exceptional facilities; and by physicians seeking the ideal combination of teaching and practicing medicine in a research-based university setting.

UICOMP's main clinical partner is OSF Healthcare Children's Hospital of Illinois, a 136-bed, full-service hospital, with physicians in more than 140 subspecialties. Located on the campus of OSF St. Francis Medical Center, it's the pediatric teaching affiliate of UICOMP, the state's only major pediatric teaching hospital outside Chicago—and home to groundbreaking pediatric research in medicine. The hospital is also proud to house the St. Jude Midwest Affiliate, which brings some of the care and services offered by St. Jude in Memphis to central Illinois.

Malpractice insurance is provided by the University of Illinois system and an excellent benefits package is available including vacations, sick time, CME, health and life insurance and retirement plan.

### Position Summary

Provide outpatient diagnostic and management services for patients in the region with general psychiatric and behavioral needs. Participate in undergraduate, graduate and continuing education program of the Department.

### Duties & Responsibilities

- The Department of Pediatrics, University of Illinois College of Medicine at Peoria is seeking psychiatrist who has completed a fellowship in Child and Adolescent Psychiatry at the level of Assistant/Associate Professor or Professor.
- Responsibilities – Child Psychiatrist
- Participate in undergraduate, graduate and continuing education program of the Department.
- Provide outpatient diagnostic and management services for patients in the region with general psychiatric and behavioral needs.
- Provide inpatient psychiatric consultation for children and adolescents.
- Organize and conduct research programs in Child Psychiatry.
- Perform other duties of a university faculty member including committee assignments, curriculum development, student counseling, and administration.

### Minimum Qualifications

- Eligible for licensure in Illinois
- Board Certified in Psychiatry
- Board Certified/Board Eligible in Child and Adolescent Psychiatry

For fullest consideration, please submit your application by 9/6/2023 at:

<https://uic.csod.com/ux/ats/careersite/1/home/requisition/6600?c=uic>

The University of Illinois System is an equal opportunity employer, including but not limited to disability and/or veteran status, and complies with all applicable state and federal employment mandates. Please visit Required Employment Notices and Posters at: <https://www.hr.uillinois.edu/cms/one.aspx?portalId=4292&pageId=5705> to view our non-discrimination statement and find additional information about required background checks, sexual harassment/misconduct disclosures, COVID-19 vaccination requirement, and employment eligibility review through E-Verify.

The University of Illinois conducts background checks on all job candidates upon acceptance of a contingent offer of employment. Background checks will be performed in compliance with the Fair Credit Reporting Act.

As an EOE/AA employer, the University of Illinois encourages applications from individuals regardless of an applicant's race, color, religion, sex, gender identity, sexual orientation, national origin, and Veteran or disability status.

The university provides accommodations to applicants and employees. Request an Accommodation at <https://jobs.uic.edu/request-and-accomodation/>

PSYCHIATRIC  
NEWS

BRIEF

Enable

## Psychiatric News Brief

With the American Psychiatric Association's new flash briefing, *Psychiatric News Brief*, you can now listen to synopses of curated articles from *Psychiatric News*. Simply enable this skill and you can listen anytime you choose throughout your day by just saying "Alexa, what's my flash briefing" or "Alexa, tell me what's new."

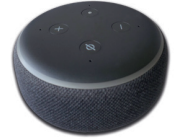

Flash briefing is a customizable Amazon skill that includes updates from your favorite content services. When you say, "Alexa, what's my flash briefing?" or "Alexa, what's the news," you'll hear updates from any organization that you have enabled.

Go to [psychnews.psychiatryonline.org/alexa](https://psychnews.psychiatryonline.org/alexa) to sign up now!

AMERICAN  
PSYCHIATRIC  
ASSOCIATION  
PUBLISHING

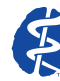

www.appi.org  
Email: [appi@psych.org](mailto:appi@psych.org)  
Phone: 1-800-368-5777

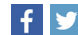

## The American Psychiatric Association Publishing Textbook of Schizophrenia, Second Edition

Edited by Jeffrey A. Lieberman, M.D.,  
T. Scott Stroup, M.D., M.P.H.,  
Diana O. Perkins, M.D., M.P.H., and  
Lisa B. Dixon, M.D., M.P.H.

Designed to bring the reader up to date on the latest research, this new edition represents a complete overhaul of the previous text, with a new structure, new chapters, and new contributors. *The American Psychiatric Association Publishing Textbook of Schizophrenia* furnishes evidence-based and cutting-edge knowledge for the next generation of students, trainees, and clinicians.

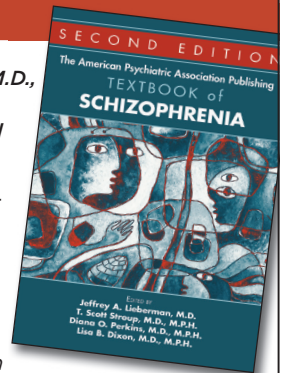

2020 • 336 pages • ISBN 978-1-61537-172-3 • Hardcover  
\$140.00 • Item #37172

2020 • 336 pages • ISBN 978-1-61537-291-1 • eBook  
\$112.00 • Item #37291

AMERICAN  
PSYCHIATRIC  
ASSOCIATION  
PUBLISHING

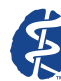

www.appi.org  
Email: [appi@psych.org](mailto:appi@psych.org)  
Toll Free: 1-800-368-5777

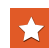

20% Discount for American Psychiatric Association Members  
25% Discount for APA Resident-Fellow Members
